# Supplementary material
Source: Springer Nature journal article supplement (https://www.springermedizin.de/resource/supplementary/13058_2011_2934_MOESM10_ESM.pdf/9702912)

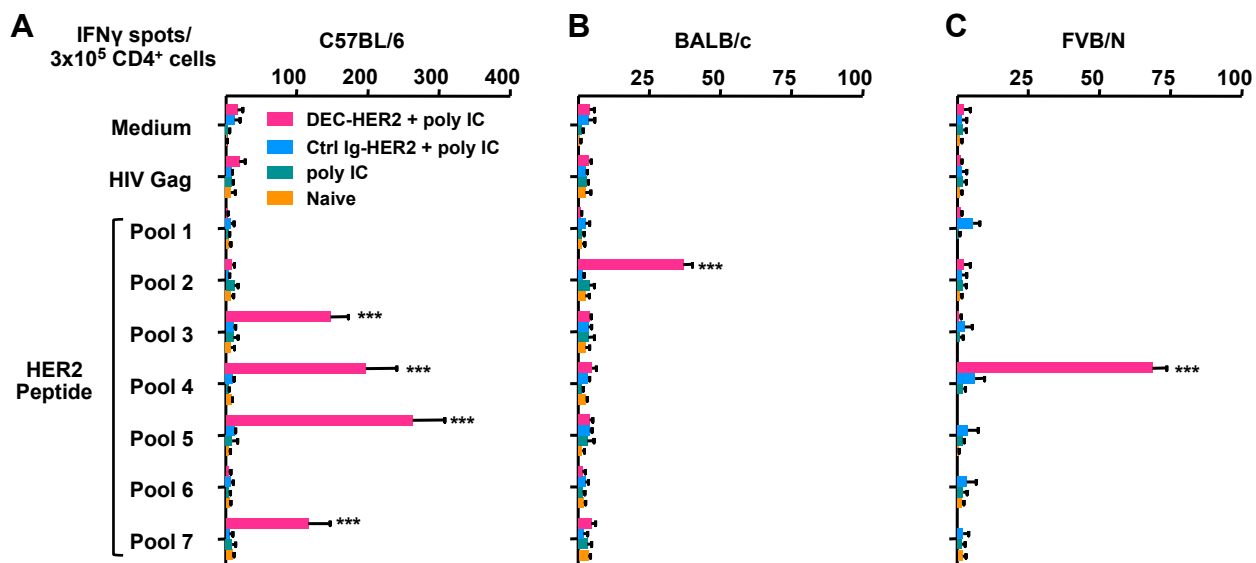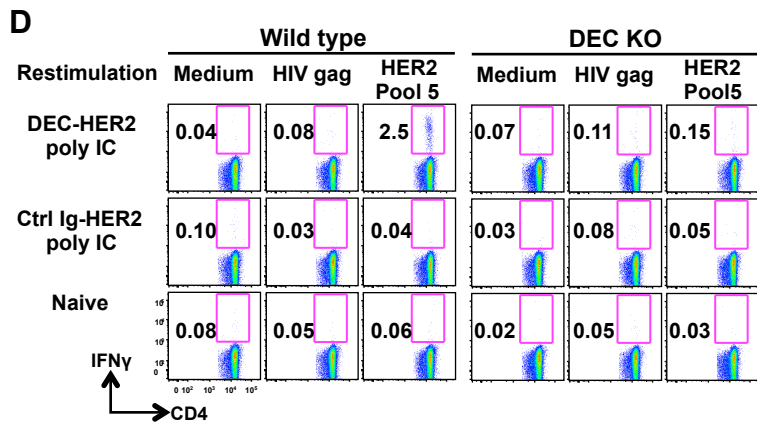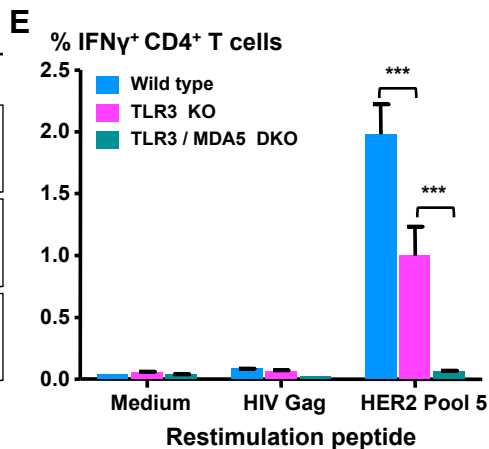

Supplement: MOESM10 [file 9702912]
